# Supplementary material
Source: Springer Nature journal article supplement (https://www.springermedizin.de/resource/supplementary/12936_2014_3716_MOESM3_ESM.pdf/9545266)

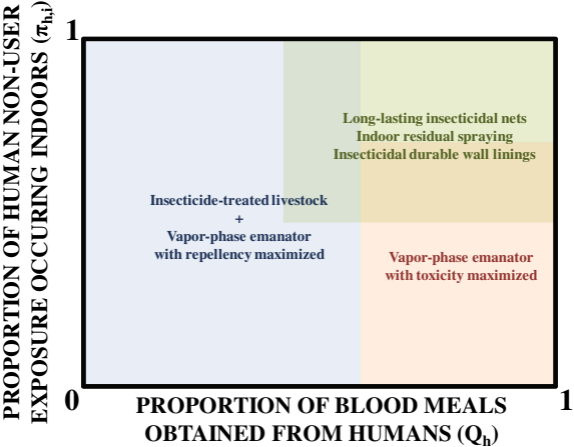

**Behavioural parameter space mapping**

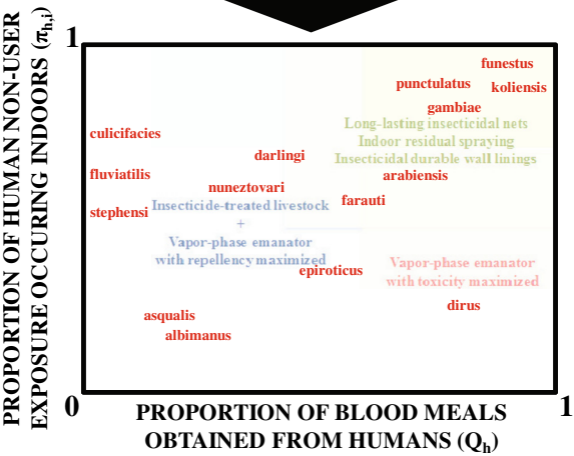

Supplement: MOESM3 [file 9545266]
